# Supplementary material
Source: Springer Nature journal article supplement (https://www.springermedizin.de/resource/supplementary/12889_2009_1957_MOESM1_ESM.pdf/9485574)

### Age-standardised hip fracture incidence rates and standardised rate ratios, Austria and Germany, men

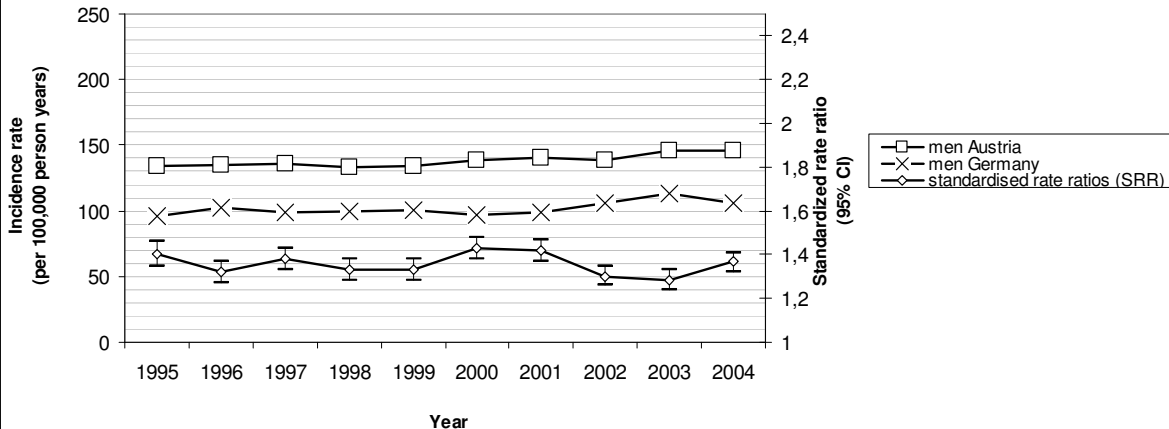

### Age-standardised hip fracture incidence rates and standardised rate ratios, Austria and Germany, women

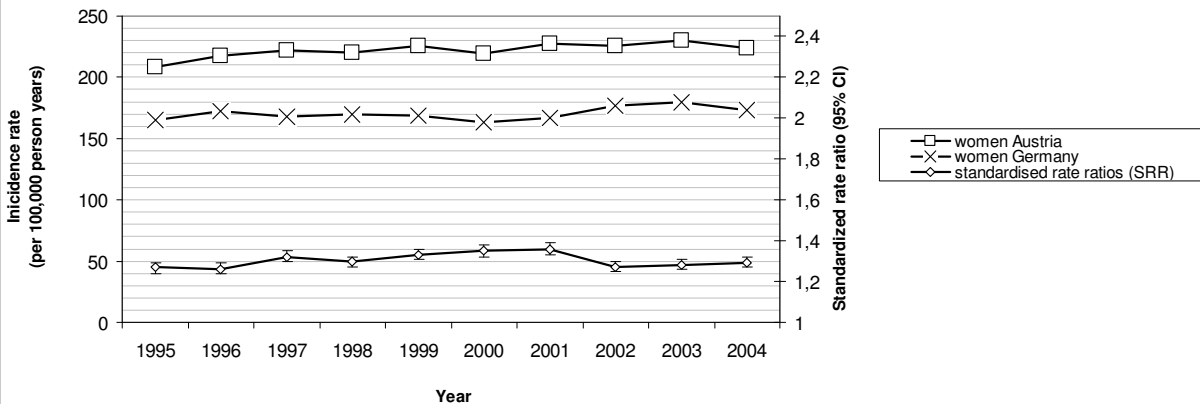

Supplement: MOESM1 [file 9485574]
